# Supplementary material for: Ultra-Wide Bandgap in Two-Dimensional Metamaterial Embedded with Acoustic Black Hole Structures
Source: MDPI journal article supplement (doi:10.3390/app112411788), 2021-12-11
Supplement: s1 [file s1]

# Ultra-Wide Bandgap in a Two Dimensional Metamaterial Embedded with Acoustic Black Hole Structures

Xiaofei lyu <sup>1</sup>, Qian Ding <sup>1,2,\*</sup>, Zhisai Ma <sup>1,2</sup> and Tianzhi Yang <sup>3,\*</sup>

<sup>1</sup> Department of Mechanics, Tianjin University, Tianjin 300350, China

<sup>2</sup> Tianjin Key Laboratory of Nonlinear Dynamics and Control, Tianjin 300350, China

<sup>3</sup> School of Mechanical Engineering and Automation, Northeastern University, Shenyang 110819, China

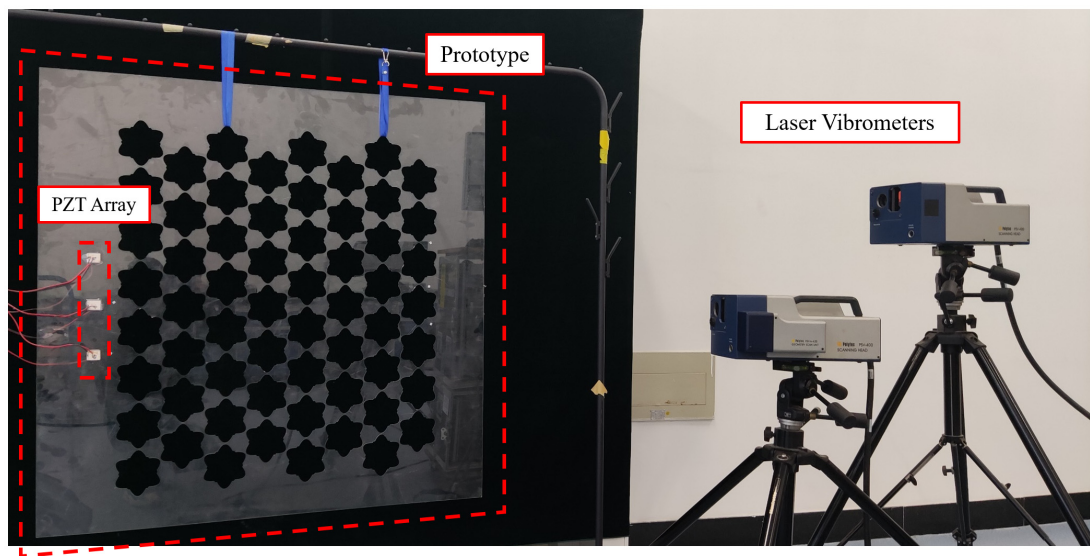

**Figure S1.** The experimental setup. The prototype is supported with two strings to mimic free boundaries. 6 PZT-5H chips are pasted on the left of the plate, and each two chips are located in the same position on both sides of the plate. A periodic chirp signal from 0 to 20 kHz was applied to the PZT array. The response signals of two measuring points are measured by two laser vibrometers.
